# Supplementary material for: Genome-Wide Analysis and Identification of 1-Aminocyclopropane-1-Carboxylate Synthase (ACS) Gene Family in Wheat (Triticum aestivum L.)
Source: MDPI journal article supplement (doi:10.3390/ijms241311158), 2023-07-06
Supplement: s1 [file s1]

```

      *      20      *      40      *      60
TaACS01 : ----- : -
TaACS02 : ----- : -
TaACS03 : ----- : -
TaACS04 : ----- : -
TaACS05 : ----- : -
TaACS06 : ----- : -
TaACS07 : ----- : -
TaACS08 : MSRKGD RADKKPHNPRS PRGVGGDREGGGRQQRRADGGMRIVVPLQG VVQGRGGLVLGSLIPCALF : 66
TaACS09 : ----- : -
TaACS10 : ----- : -
TaACS11 : MSRKGD RADKKPR-PRSPRGGGGDREGGGRQQRRADGGMRIVVPLQG VVQGRGGLVLGSLIPCALF : 65
TaACS12 : ----- : -

```

```

      *      80      *      100      *      120      *
TaACS01 : -----MASRSAE LLSRMAAGDGHGE : 20
TaACS02 : -----MASRSAE LLSRMAAGDGHGE : 20
TaACS03 : -----MASRSAE LLSRMAAGDGHGE : 20
TaACS04 : -----MLLPAASSPPLSRVATSSAHGE : 22
TaACS05 : -----MGGMLLPAASTPPLSRVATSSAHGE : 25
TaACS06 : -----MLLPAASSPPLSRVATSSAHGE : 22
TaACS07 : -----MVNKVADEPQLLSKKKAGCNTHGQ : 23
TaACS08 : YFLQLYIKRNRPPPGSPTAAPSSASPAAAAGPLSPIHRSLSRGLLSPRALPALSARGAVVRAGDD : 132
TaACS09 : -----MVNKVADEPQLLSKKKAGCNTHGQ : 23
TaACS10 : -----MVNKVADEPQLLSKKKAGCNTHGQ : 23
TaACS11 : YFLQLYIKRNRPPPGSPTAASSAAPAGAAAAGPLSPIHRSLSRGLLSPRALPALSARGALVRAGDD : 131
TaACS12 : ----- : -

```

```

      140      *      160      *      180      *      2
TaACS01 : NSSYFDGWKAYDMNPFHPQDNRGGVVIQMGLAENQLSLDLIEEWSKAHPEAS----ICTAEGASQFK : 82
TaACS02 : NSSYFDGWKAYDMNPFHPQDNRGGVVIQMGLAENQLSLDLIEEWSKAHPEAS----ICTAEGASQFK : 82
TaACS03 : NSSYFDGWKAYDMNPFHPQDNRGGVVIQMGLAENQLSLDLIEEWSKAHPEAS----ICTAEGASQFK : 82
TaACS04 : DSPYFAGWRAYDDDPYDAVTNPGGVIQMGLAENQVSFDLLEGFLREHPEAAGWGGARPGSGVASFR : 88
TaACS05 : DSPYFAGWRAYDDDPYDAVTNPGGVIQMGLAENQVSFDLLEGFLREHPEAAGWGGARPGSGVASFR : 91
TaACS06 : DSPYFAGWRAYDDDPYDAVTNPGGVIQMGLAENQVSFDLLEGFLREHPEAAGWGGARPGSGVASFR : 88
TaACS07 : DSSYFLGWEEYEKNPYHPTTNPGGIIQMGLAENQLSFDLVEEWLEKNPDALG---LRRG-AASVFR : 85
TaACS08 : DSLVYAGLRRCADDPYHPASNPSGVIQLGLAENHLSLDLVREWMEEHAGPAMTPGGGDEERDLTIS : 198
TaACS09 : DSSYFLGWEEYEKNPFDAITNPSGIIQMGLAENQLSFDLVEEWLEKNPDALG---LRRG-AASVFR : 85
TaACS10 : DSSYFLGWEEYEKNPYHPTTNPGGIIQMGLAENQLSFDLVEEWLEKNPNALG---LRRG-AASVFR : 85
TaACS11 : DSLVYAGLRRCADDPYHPASNPAAGVIQLGLAENHLSLDLVREWMEEHAGPAMTPGGGDEERDLTIS : 197
TaACS12 : -----MKLSLDLVREWMEEHAGPAMTPGGGAEEERDLTIS : 34

```

Box1

```

      00      *      220      *      240      *      260
TaACS01 : RIANFQDYHGLPEFRQAMAQFMGQVRGWKARFDPDRVVMSSGGATGAQETLAFCLANPGEAFLVPTP : 148
TaACS02 : RIANFQDYHGLPEFRQAMAQFMGQVRGWKARFDPDRVVMSSGGATGAQETLAFCLANPGEAFLVPTP : 148
TaACS03 : RIANFQDYHGLPEFRQAMAQFMGQVRGWKARFDPDRVVMSSGGATGAQETLAFCLANPGEAFLVPTP : 148
TaACS04 : DNALFQDYHGLKTRKAMASFMEKIRGGKVRFPDRIVLTAGATAANELLTFILANPGDALLIPTP : 154
TaACS05 : DNALFQDYHGLKTRKAMASFMEKIRGGKVRFPDRIVLTAGATAANELLTFILANPGDALLIPTP : 157
TaACS06 : DNALFQDYHGLKTRKAMASFMEKIRGGKVRFPDRIVLTAGATAANELLTFILANPGDALLIPTP : 154
TaACS07 : ELALFQDYHGLPAFKNALARFMSEQRDFRVAFDPSNIVLTAGATSANEALMFCLADQGDAFLIPTP : 151
TaACS08 : GLATYQPYDGILALKMALAGFMRQIMHESVSFDPSQMVITSGATPAMEILSFCLADPGNAFLVPSP : 264
TaACS09 : ELALFQDYHGLPAFKNALARFMSEQRDYKVAFDPSNIVLTAGATSANEALMFCLADQGDAFLIPTP : 151
TaACS10 : ELALFQDYHGLPAFKNALARFMSEQRDFRVAFDPSNIVLTAGATSANEALMFCLADQGDAFLIPTP : 151
TaACS11 : GLATYQPYDGILALKMALAGFMRQIMQESVSFDPSQMVITSGATPAMEILSFCLADPGNAFLVPSP : 263
TaACS12 : GLATYQPYDGILALKMAVAGFMRQIMQESVSFDPSQMVITSGATPAMEILSFCLADPGNAFLVPSP : 100

```

Box2

Box3

```

      *      280      *      300      *      320      *
TaACS01 : YYPGFDRDCCWRSQVKKLLPIECHSSNDFRITREAVVAAYEGARSSGVRVKGILITNPSNPLGTTAD : 214
TaACS02 : YYPGFDRDCCWRSQVKKLLPIECHSSNDFRITREAVVAAYESARSSGVRVKGILITNPSNPLGTTAD : 214
TaACS03 : YYPGFDRDCCWRSQVKKLLPIECHSSNDFRITREAVVAAYESATSSGVRVKGILITNPSNPLGTTAD : 214
TaACS04 : YYPGFDRDLRWRTGVNIVPVHCHSSNGFQVTVAALAAAYEEAAAAGMSVRGVLLTNPSNPLGTTIVE : 220

```

Box4

TaACS05 : YYPGFDRDLRWRTGVNIVPVHCHSSNGFQVTVAALEAAYEEAAAAGMSVRGVLLTNPSNPLGTTVE : 223  
 TaACS06 : YYPGFDRDLRWRTGVNIVPVHCHSSNGFQVTVAALEAAYEEAAAAGMSVRGVLLTNPSNPLGTTVE : 220  
 TaACS07 : YYPGFDRDLRWRTGAEIVPVHCHTSANGFRVTRSALDDAYRRAQKRRLRVKGVLLTNPSNPLGTAVP : 217  
 TaACS08 : YYPGWDRDIKWRTGIELIPVPCRSTDNFNISITALEIAYNQAKKRGVRVRGVLLSNPSNPTGSFVP : 330  
 TaACS09 : YYPGFDRDLRWRTGAEIVPVHCHTSANGFRVTRSALDDAYRRAQKRRLRVKGVLLTNPSNPLGTAVP : 217  
 TaACS10 : YYPGFDRDLRWRTGAEIVPVHCHTSANGFRVTRSALDDAYRRAQKRRLRIKGVLLTNPSNPLGTAVP : 217  
 TaACS11 : YYPGWDRDIKWRTGIELIPVPCRSTDNFNISITALEIAYNQAKKRGVRVRGVLLSNPSNPTGSFVP : 329  
 TaACS12 : YYPGWDRDIKWRTGIELIPVPCRSTDNFNISITALEIAYNQAKKRGVRVRGVLLSNPSNPTGSFVP : 166

Box4

340 \* 360 \* 380 \*  
 TaACS01 : RATLAMLATFATEHRVHLICDEIYAGSVFAKPEYVSTAEVIEHDAPGADRD----LIHIAYSLSKD : 276  
 TaACS02 : RATLAMLATFATEHRVHLICDEIYAGSVFAKPEYVSTAEVIEHDAPGVDRD----LIHIAYSLSKD : 276  
 TaACS03 : RATLAMLATFATEHRVHLICDEIYAGSVFAKPEYVSTAEVIERDAPGADRD----LIHIAYSLSKD : 276  
 TaACS04 : RSALEDVLDFFVVRKNIHLISDEIYSGSVFAAPDLVSVAVELVESRGDDVAG----RVHIVYLSKD : 281  
 TaACS05 : RSVLEDVLDFFVVRKNIHLISDEIYSGSVFAAPDLVSVAVELVESRGDDIAG----RVHIVYLSKD : 284  
 TaACS06 : RSVLEDVLDFFVVRKNIHLISDEIYSGSVFAAPDLVSVAVELVESRGDDVAG----RVHIVYLSKD : 281  
 TaACS07 : RADLEMIVDFVAAKGIIHLVSEIYSGTAFSEPGFVSVLEVLAARAPLAADYTLDDRVHVVYLSKD : 283  
 TaACS08 : KQTLHDLDFATEKNIHLISDEVFAGSTFGSGEFVSVAEVNELEDFDRG----RVHIIYGLSKD : 391  
 TaACS09 : RADLEMIVDFVAAKGIIHLVSEIYSGTAFSEPGFVSVLEVLAARAPLATEFALDDRVHVVYLSKD : 283  
 TaACS10 : RADLEMIVDFVAAKGIIHLVSEIYSGTAFSEPGFVSVLEVLAARAPLAADYALDDRVHVVYLSKD : 283  
 TaACS11 : KQTLRDLLDFATEKNIHLISDEVFAGSTFGSGEFVSVAEVNELEDFDRG----RVHIIYGLSKD : 390  
 TaACS12 : KQTLRDLLDFATEKNIHLISDEVFAGSTFGSGEFVSVAVELVNELEDFDRG----RVHIIYGLSKD : 227

Box5

400 \* 420 \* 440 \* 460  
 TaACS01 : FGLPGFRVGIYVSYNDVAVACARKMSSFGVLVSSQTQLFLAKMLGDEEFMSRFLRESARRLAARHEL : 342  
 TaACS02 : FGLPGFRVGIYVSYNDVAVACARKMSSFGVLVSSQTQLFLAKMLGDEEFMARFLSESARRLAARHEL : 342  
 TaACS03 : FGLPGFRVGIYVSYNDVAVACARKMSSFGVLVSSQTQLFLAKMLGDEEFMARFLRESARRLAARHEL : 342  
 TaACS04 : LGLPGFRVGVVYSYNDVAVTAARMSSFTLVSSQTQKTLAAMLSDAAFAQEYIRTNRERLRVRHDH : 347  
 TaACS05 : LGLPGFRVGVVYSYNDVAVTAARMSSFTLVSSQTQKTLAAMLSDAAFAQEYIRTNRERLRVRHDH : 350  
 TaACS06 : LGLPGFRVGVVYSYNDVAVTAARMSSFTLVSSQTQKTLAAMLSDAAFAQEYIRTNRERLRVRHDH : 347  
 TaACS07 : LGLPGFRVGAIYSSNPVAVSAATKMSSFGVLVSSQTQYLLAALLGDKDFTRRYLAENKRRIKERHDQ : 349  
 TaACS08 : LSLAGFRVGVIIYSYNESIVEAAAKIARFSSVSTPTQRLLVAMLSQDKFISNYLKVNRELRKAYNL : 457  
 TaACS09 : LGLPGFRVGAIYSSNPVAVSAATKMSSFGVLVSSQTQYLLAALLGDKDFTRRYLAENKRRIKERHDQ : 349  
 TaACS10 : LGLPGFRVGAIYSSNAAVSAATKMSSFGVLVSSQTQYLLAALLGDKDFTRRYLAENKRRIKERHDQ : 349  
 TaACS11 : LSLAGFRVGVIIYSYNESIVEAAAKIARFSSVSTPTQRLLVAMLSQDKFISNYLKVNRELRKAYNL : 456  
 TaACS12 : LSLAGFRVGVIIYSYNESIVEAAAKIARFSSVSTPTQRLLVAMLSQDKFISNYLKVNRELRKAYNL : 293

Box5

Box6

\* 480 \* 500 \* 520  
 TaACS01 : FTSLREVVGIGCLGGNAGLFSWMDLRGMLR---EKTAAEAELELWRVIRKVKLVNVPGSTSFHCSEP : 405  
 TaACS02 : FTSLREVVGIGCLGGNAGLFSWMDLRGMLR---EKTAAEAELELWRVIRKVKLVNVPGSTSFHCSEP : 405  
 TaACS03 : FTSLREVVGIGCLGGNAGLFSWMDLRGMLR---EKTAAEAELELWRVIRKVKLVNVPGSTSFHCSEP : 405  
 TaACS04 : MVAGLARGVPCPLPSNAGLFFVWMDMRLLRDGGEATVADELRLWDLMLREVKLVNISPSSCHCSEP : 413  
 TaACS05 : MVAGLARGVPCPLPSNAGLFFVWMDMRLLRDGGEATVADELRLWDLMLHEVKLVNISPSSCHCSEP : 416  
 TaACS06 : MVAGLARGVPCPLPSNAGLFFVWMDMRLLRDGGEATVANELRLWDLMLHEVKLVNISPSSCHCSEP : 413  
 TaACS07 : LVDGLKEIGIACLESNAGLFCWVNMSHLMH---ARFEGEMTLWKKVVFVGLNISPSSCHCSEP : 412  
 TaACS08 : LVDALKQVGIECFKSSGGFYCWADMSKFIR---SYSEKGERRLWDRLLLEAKVNVTPGSSCHCIEP : 520  
 TaACS09 : LVDGLKEIGIACLESNAGLFCWVNMSHLMH---TRFEGEMTLWKKVVFVGLNISPSSCHCSEP : 412  
 TaACS10 : LVDGLKEIGIACLESNAGLFCWVNMSHLMH---ARFEGEMTLWKKVVFVGLNISPSSCHCSEP : 412  
 TaACS11 : LVDALKQVGIECFKSSGGFYCWADMSKFIR---SYSEKGERSLWDRLLLEAKVNVTPGSSCHCIEP : 519  
 TaACS12 : LVDALKQVGIECFKSSGGFYCWADMSKFIR---SYSEKGERRLWDRLLLEAKVNVTPGSSCHCIEP : 356

Box7

\* 540 \* 560 \* 580 \*  
 TaACS01 : GWFRVCHANMDETMGVALSRIKDFVRQHQQQKAKAQRWAARSHLHLSLQRHGAMASQYHALSSPM : 471  
 TaACS02 : GWFRVCHANMDETMGVALNRIRDFVRQHQQQKAKAQRWAARGHLHLSLQRHGAMASQYHALSSPM : 471  
 TaACS03 : GWFRVCHANMDETMGVALSRIKDFVRQHQQQKAKAQRWAARGHLHLSLQRHGAMASQYHALSSPM : 471  
 TaACS04 : GWFRVCFANMSLDTLDVALARMSRFMDRWN---KAT-----TLQEQH\*----- : 452  
 TaACS05 : GWFRVCFANMSLDTLDVALARMSRLMDRWN---KAT-----TLQEQH\*----- : 455  
 TaACS06 : GWFRVCFANMSLDTLDVALARMSRFMDRWN---KAT-----TLQEQH\*----- : 452  
 TaACS07 : GWFRVCFANMSAKTLDVAMQRLREFVQTCSFKAAPAALR-----RAAGPARMSMCPLAMNMKW : 470  
 TaACS08 : GWFRCCFTTLRERDIPVVVERLRRVTASHKSNR\*----- : 553  
 TaACS09 : GWFRVCFANMSAKTLDVAMQRLGEFVQTSSCKAAPAALR-----RAAGPARMSMCPLAMNMKW : 470  
 TaACS10 : GWFRVCFANMSAKTLDVAMQRLGGFVQTSSCKAAPAALR-----RAAGPARMSMCPLAMNMKW : 470

Box7

TaACS11 : GWFRCCFTTIREQDIPVVVERLRRITDGHKSNC\*----- : 552  
 TaACS12 : GWFRCCFTTIREQDIPVVVERLRRVTDGHKSNR\*----- : 389  
Box7

600                      \*  
 TaACS01 : AALLSPQSPLVHAAS\* : 486  
 TaACS02 : AALLSPQSPLVHAAS\* : 486  
 TaACS03 : AALLSPQSPLVHAAS\* : 486  
 TaACS04 : ----- : -  
 TaACS05 : ----- : -  
 TaACS06 : ----- : -  
 TaACS07 : ALRLTPGFADRKAER\* : 485  
 TaACS08 : ----- : -  
 TaACS09 : ALRLTPSFADRKAER\* : 485  
 TaACS10 : ALRLTPGFADRKAER\* : 485  
 TaACS11 : ----- : -  
 TaACS12 : ----- : -

**Figure S1.** Multiple alignment of the domains from the TaACS proteins based on the genedoc software. The seven highly conserved domains of the ACS isozymes are marked as boxes 1–7. \* represents the omitted amino acid sequence number. Green represents hydrophobic amino acids, red represents charged amino acids, and blue represents polar amino acids.
